# Supplementary material for: PIM1 Promotes Survival of Cardiomyocytes by Upregulating c-Kit Protein Expression
Source: PubMed Central journal article supplement (PMC7563506; doi:10.3390/cells9092001), 2020-08-31
Supplement: cells-09-02001-s001.pdf [file cells-09-02001-s001.pdf]

**PIM1 Promotes Survival of Cardiomyocytes by Upregulating c-Kit  
Protein Expression**

*Cells*

David E Ebeid <sup>1\*</sup>, Fareheh Firouzi<sup>1\*</sup>, Carolina Y Esquer<sup>1</sup>, Julian M  
Navarrete<sup>1</sup>, Bingyan J Wang<sup>1</sup>, Natalie A Gude<sup>1</sup>, Mark A Sussman<sup>1#</sup>

<sup>1</sup> Department of Biology, San Diego State University, San Diego, CA,  
USA

**\* D.E. and F.F. contributed equally to this manuscript.**

# Correspondence:

Mark A. Sussman, PhD

(619)-594-2983

[heartman4ever@icloud.com](mailto:heartman4ever@icloud.com)

# Supplemental Figure 1

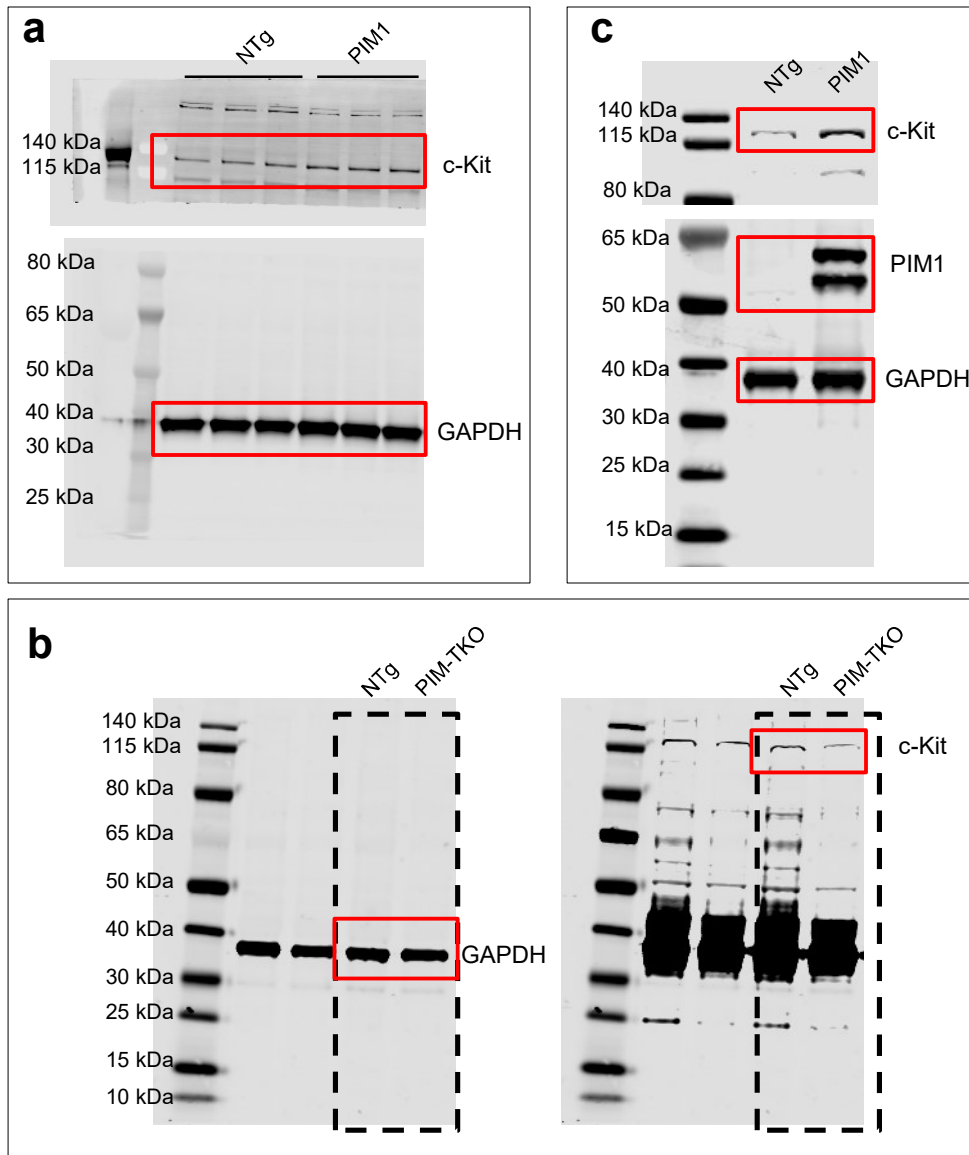

**Fig S1:** **a** Full blot of cropped image presented in Fig 1a, **b** Fig 1b, and **c** Fig 1c of the manuscript.

## Supplemental Figure 2

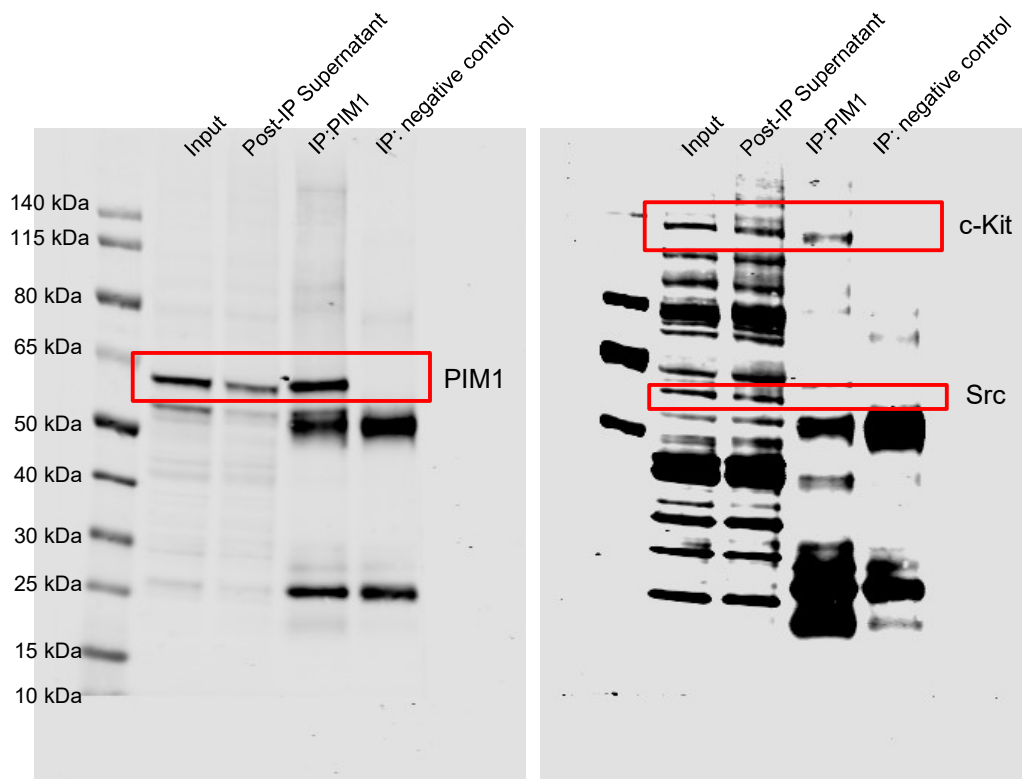

**Fig S2:** Full blot of cropped image presented in Fig 2a of the manuscript.

### Supplemental Figure 3

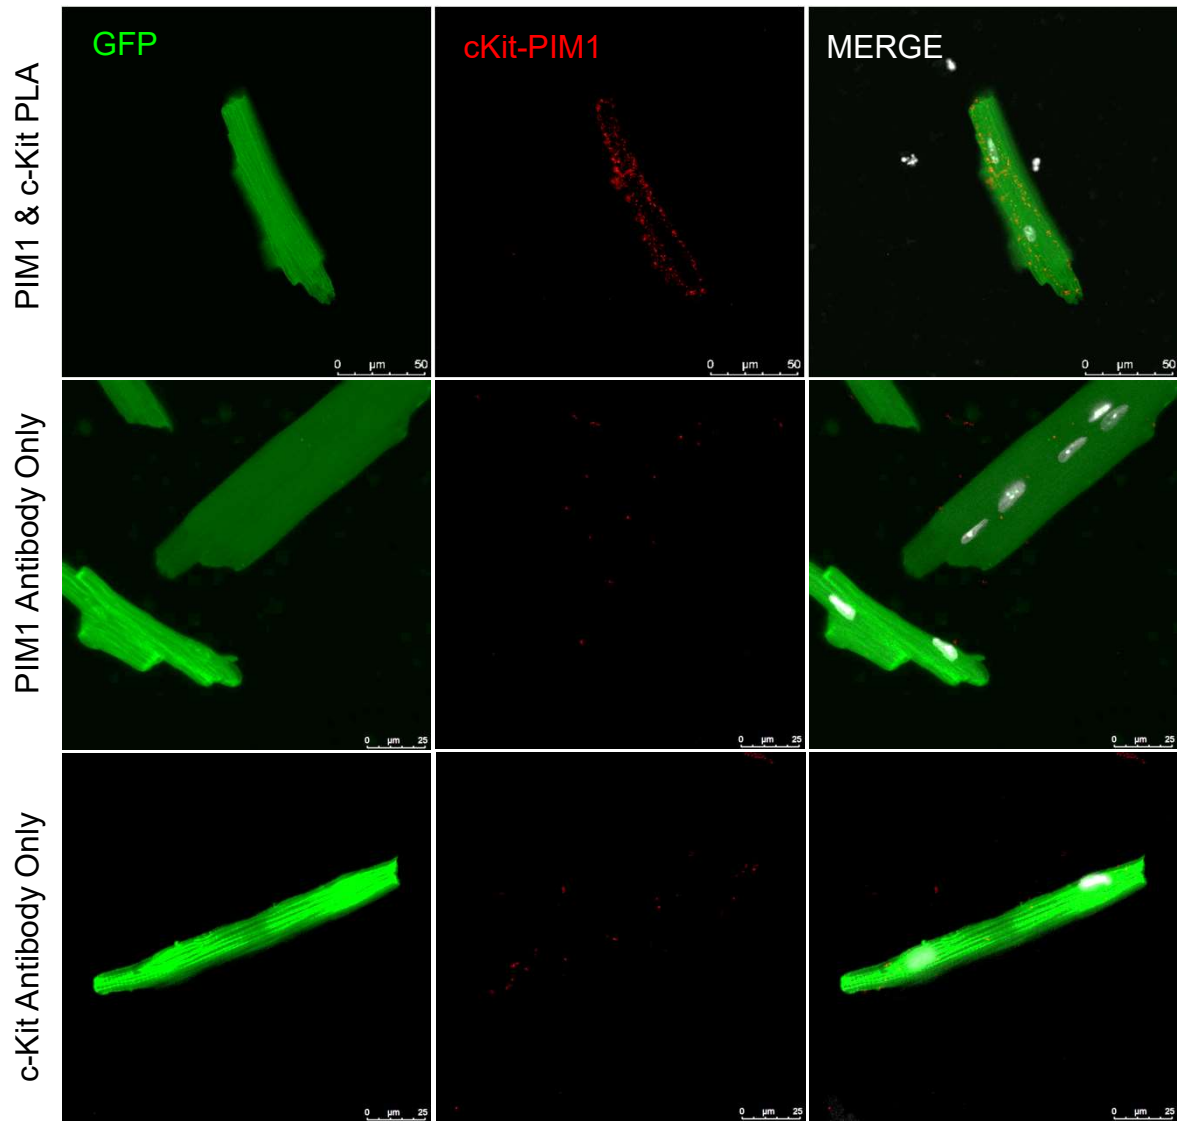

**Fig S3:** Negative controls for the Proximity Ligation Assay. Endogenous GFP is shown in green, the PLA signal is shown in red and DAPI is shown in gray.

## Supplemental Figure 4

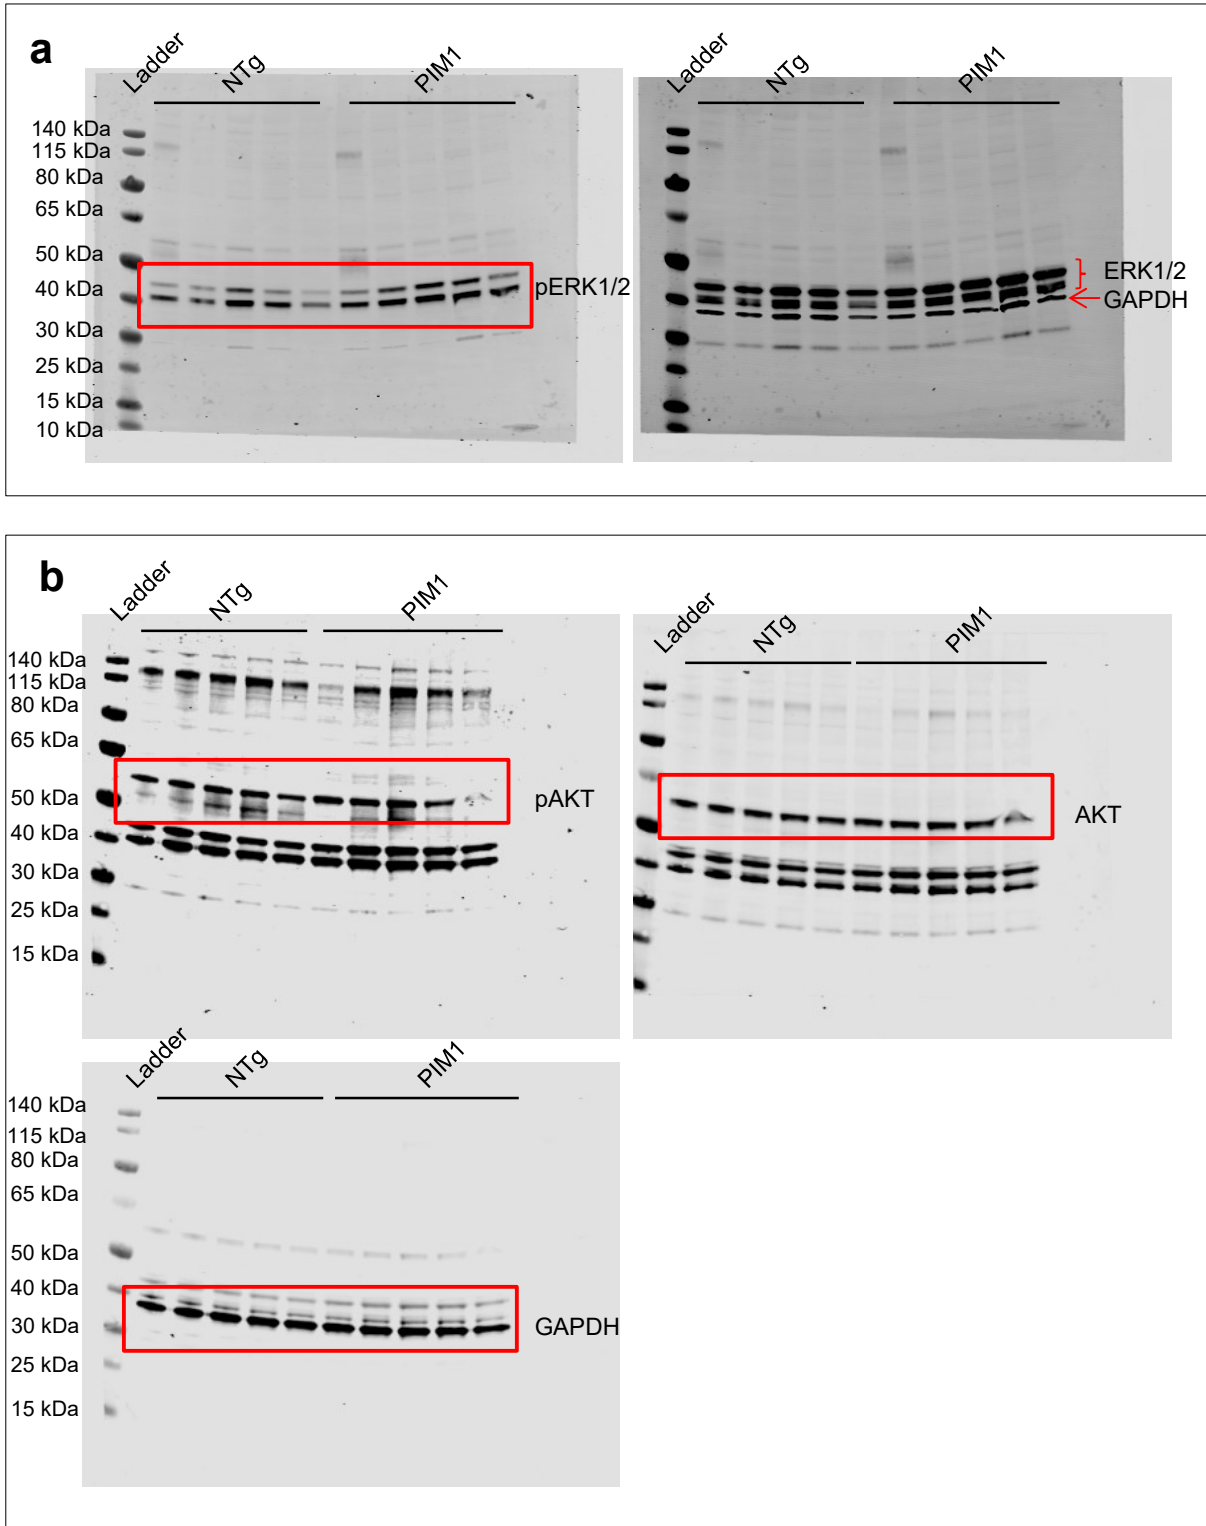

## Supplemental Figure 5

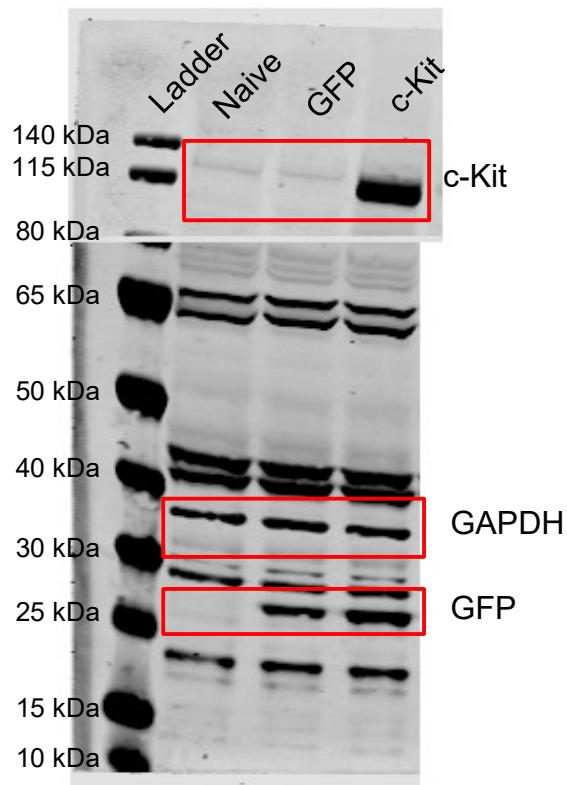

**Fig S5:** Full blot of cropped image presented in Fig 4b of the manuscript.

## Supplemental Figure 6

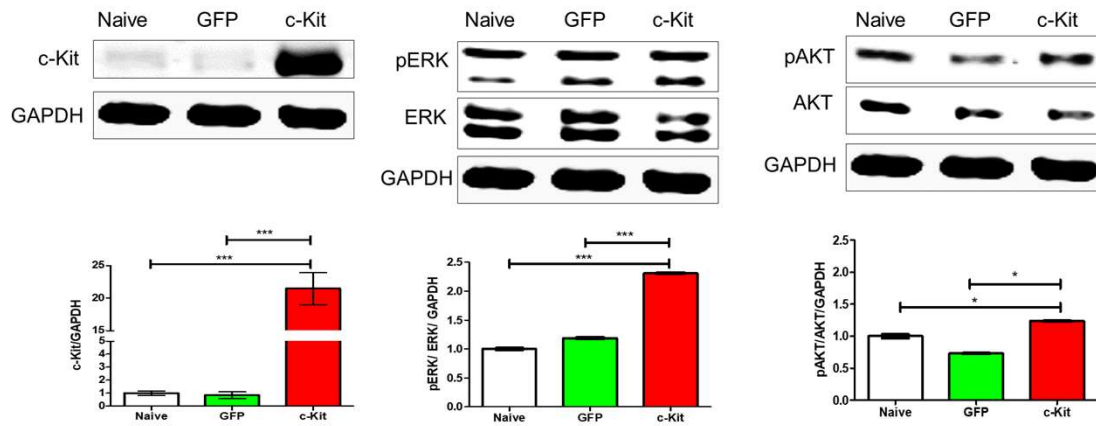

**Fig S6:** Immunoblot analysis of c-Kit, activated ERK1/2 and activated AKT in naïve and virally transduced cardiomyocytes with quantification shown below. Error bars represent SEM, \* $p < 0.05$ , \*\* $p < 0.01$  and \*\*\* $p < 0.001$  as measured by two-way ANOVA, multiple comparison with Tukey.

## Supplemental Figure 7

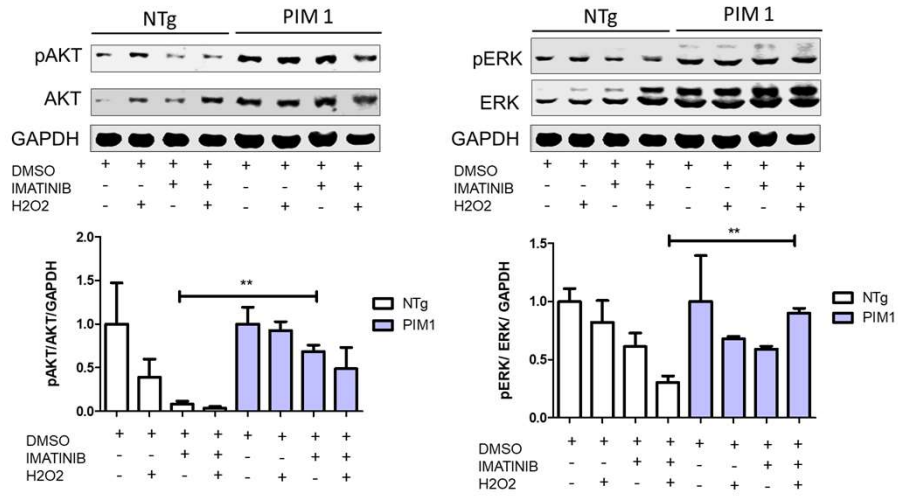

**Fig S7:** Immunoblot analysis of activated ERK1/2 and activated AKT in NTg and PIM1 overexpressing cardiomyocytes in response to oxidative stress in presence and absence of Imatinib. Quantification is shown below. Error bars represent SEM, \*\* $p < 0.01$  as measured by two-way ANOVA, multiple comparison with Tukey.
